# Supplementary material for: A review of the treatment of low–medium strength domestic wastewater using aerobic granulation technology
Source: Royal Society of Chemistry journal article supplement (doi:10.1039/c9ew00606k), 2019-12-11
Supplement: c9ew00606k1.pdf [file c9ew00606k1.pdf]

### List of Abbreviations

|                                 |                                                   |
|---------------------------------|---------------------------------------------------|
| AOB                             | Ammonia oxidizing bacteria                        |
| ATU                             | Allylthiourea                                     |
| AUSB                            | Aerobic upflow sludge blanket                     |
| BNR                             | Biological nutrients removal                      |
| BOD <sub>5</sub>                | Five-day biological oxygen demand                 |
| CAFB                            | Continuous flow airlift fluidized bed reactor     |
| CFRs                            | Continuous flow reactors                          |
| COD                             | Chemical oxygen demand                            |
| DGAOs                           | Denitrifying glycogen-accumulating organisms      |
| DO                              | Dissolved oxygen                                  |
| DPAOs                           | Denitrifying polyphosphate-accumulating organisms |
| EPS                             | Extracellular polymeric substances                |
| FA                              | Free ammonia                                      |
| GAOs                            | Glycogen-accumulating organisms                   |
| HRT                             | Hydraulic retention time                          |
| IC                              | Integrity coefficient                             |
| MLSS                            | Mixed liquor suspended solids                     |
| N <sub>2</sub> O                | Nitrous oxide                                     |
| NH <sub>3</sub> -N              | Ammoniacal nitrogen                               |
| NH <sub>4</sub> <sup>+</sup> N  | Ammonium nitrogen                                 |
| NOB                             | Nitrite oxidizing bacteria                        |
| OLR                             | Organic loading rate                              |
| PAOs                            | Polyphosphate-accumulating organisms              |
| PFRs                            | Plug-flow reactors                                |
| PN                              | Protein                                           |
| PN/A                            | Partial nitrification followed by Anammox         |
| PO <sub>4</sub> <sup>3-</sup> P | Phosphate                                         |

|          |                                                |
|----------|------------------------------------------------|
| POM      | Particulate organic matters                    |
| PS       | Polysaccharides                                |
| SBR      | Sequencing batch reactor                       |
| SCOD     | Soluble chemical oxygen demand                 |
| SND      | Simultaneous nitrification and denitrification |
| SRT      | Sludge retention time                          |
| STP      | Sewage treatment plant                         |
| SUAV     | Superficial upflow air velocity                |
| SV       | Settling velocity                              |
| SVI      | Sludge volume index                            |
| TCOD     | Total chemical oxygen demand                   |
| TN       | Total nitrogen                                 |
| TP       | Total phosphorus                               |
| TSS      | Total suspended solids                         |
| UASB     | Upflow anaerobic sludge blanket                |
| VER      | Volumetric exchange rate                       |
| VFA      | Volatile fatty acids                           |
| VSS      | Volatile suspended solids                      |
| $V_{ww}$ | Wastewater upflow velocity                     |
